# Supplementary material for: Manipulation of Cl/Br transmutation in zero-dimensional Mn2+-based metal halides toward tunable photoluminescence and thermal quenching behaviors
Source: Royal Society of Chemistry journal article supplement (doi:10.1039/d0tc05137c), 2020-12-29
Supplement: d0tc05137c1.pdf [file d0tc05137c1.pdf]

## Supporting Information

### **Manipulation of Cl/Br Transmutation in Zero-Dimensional Mn<sup>2+</sup>-Based Metal Halides toward Tunable Photoluminescence and Thermal Quenching Behaviors**

Guojun Zhou<sup>a</sup>, Zhiyang Liu<sup>b</sup>, Maxim S. Molokeev<sup>cde</sup>, Zewen Xiao<sup>b</sup>, Zhiguo Xia<sup>f</sup> and Xian-Ming Zhang<sup>\*a</sup>

<sup>a</sup> Key Laboratory of Magnetic Molecules and Magnetic Information Materials (Ministry of Education), School of Chemistry and Material Science, Shanxi Normal University, Linfen 041004, China. Email: [zhangxm@dns.sxnu.edu.cn](mailto:zhangxm@dns.sxnu.edu.cn); Tel: +86-357-2051402

<sup>b</sup> Wuhan National Laboratory for Optoelectronics, Huazhong University of Science and Technology, Wuhan 430074, China

<sup>c</sup> Laboratory of Crystal Physics, Kirensky Institute of Physics, Federal Research Center KSC SB RAS, Krasnoyarsk 660036, Russia

<sup>d</sup> Siberian Federal University, Krasnoyarsk 660041, Russia

<sup>e</sup> Department of Physics, Far Eastern State Transport University, Khabarovsk 680021, Russia

<sup>f</sup> State Key Laboratory of Luminescent Materials and Devices and Institute of Optical Communication Materials, South China University of Technology, Guangzhou 510641, China

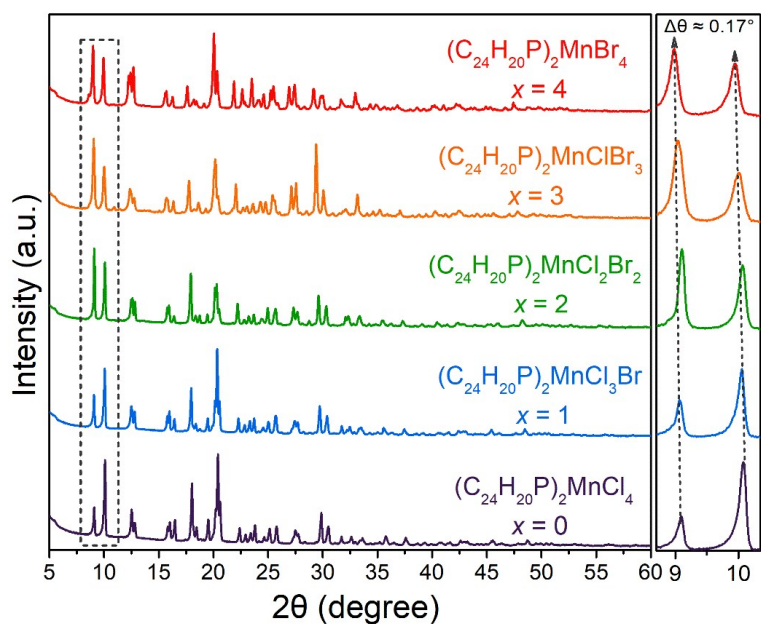

**Figure S1.** PXRD patterns of  $(C_{24}H_{20}P)_2MnCl_{4-x}Br_x$  ( $x = 0, 1, 2, 3, 4$ ) and the characteristic peaks which gradually shift to lower angles with the replacement of Cl atoms by Br.

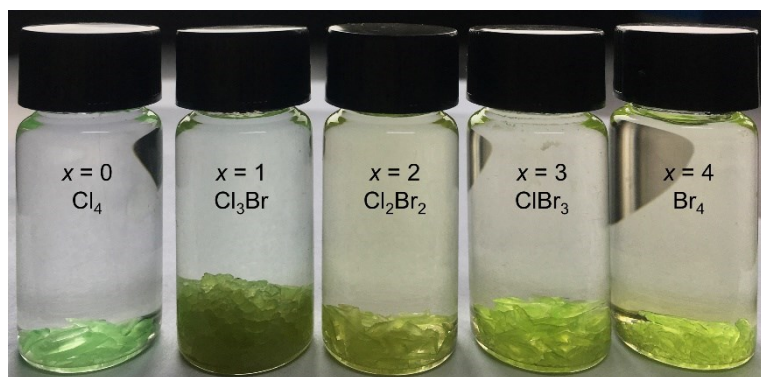

**Figure S2.** Photographs of  $(C_{24}H_{20}P)_2MnCl_{4-x}Br_x$  ( $x = 0, 1, 2, 3, 4$ ) single crystals under daylight.

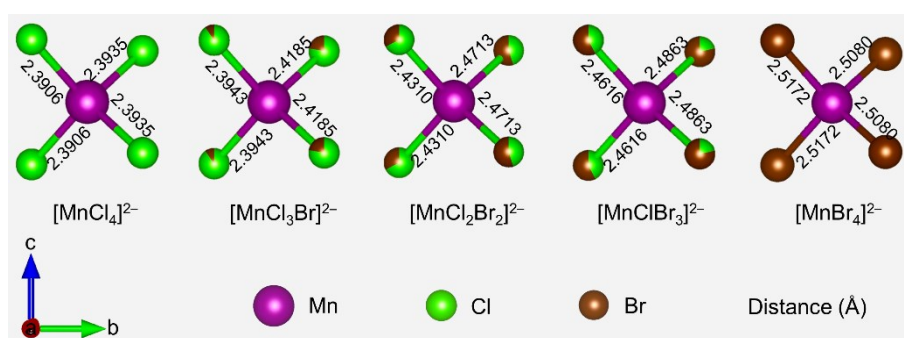

**Figure S3.** Local structures of  $[MnX_4]^{2-}$  ( $X = Cl/Br$ ) with different bond lengths.

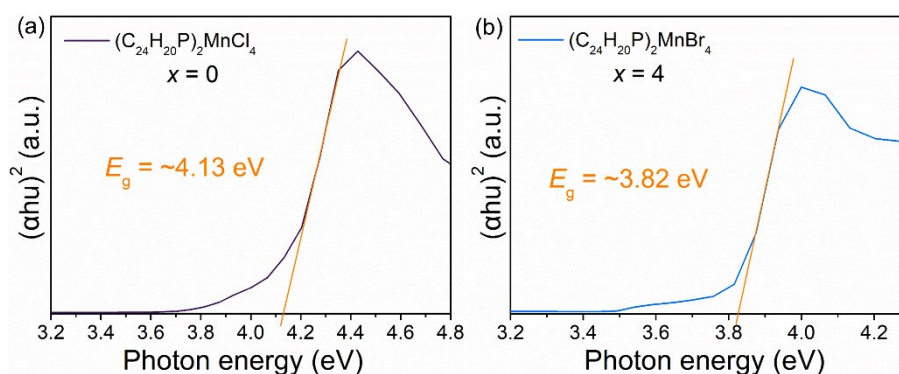

**Figure S4.** The extrapolations of band gap energy of (a)  $(\text{C}_{24}\text{H}_{20}\text{P})_2\text{MnCl}_4$  and (b)  $(\text{C}_{24}\text{H}_{20}\text{P})_2\text{MnBr}_4$ .

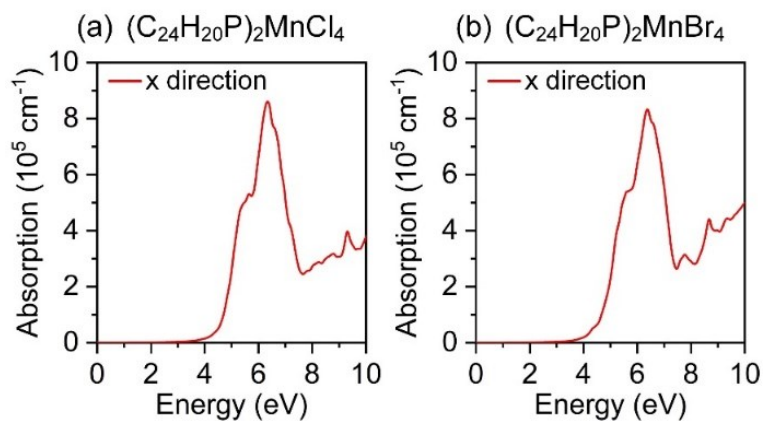

**Figure S5.** Optical absorption spectra of (a)  $(\text{C}_{24}\text{H}_{20}\text{P})_2\text{MnCl}_4$  and (b)  $(\text{C}_{24}\text{H}_{20}\text{P})_2\text{MnBr}_4$  calculated based on the HSE functional.

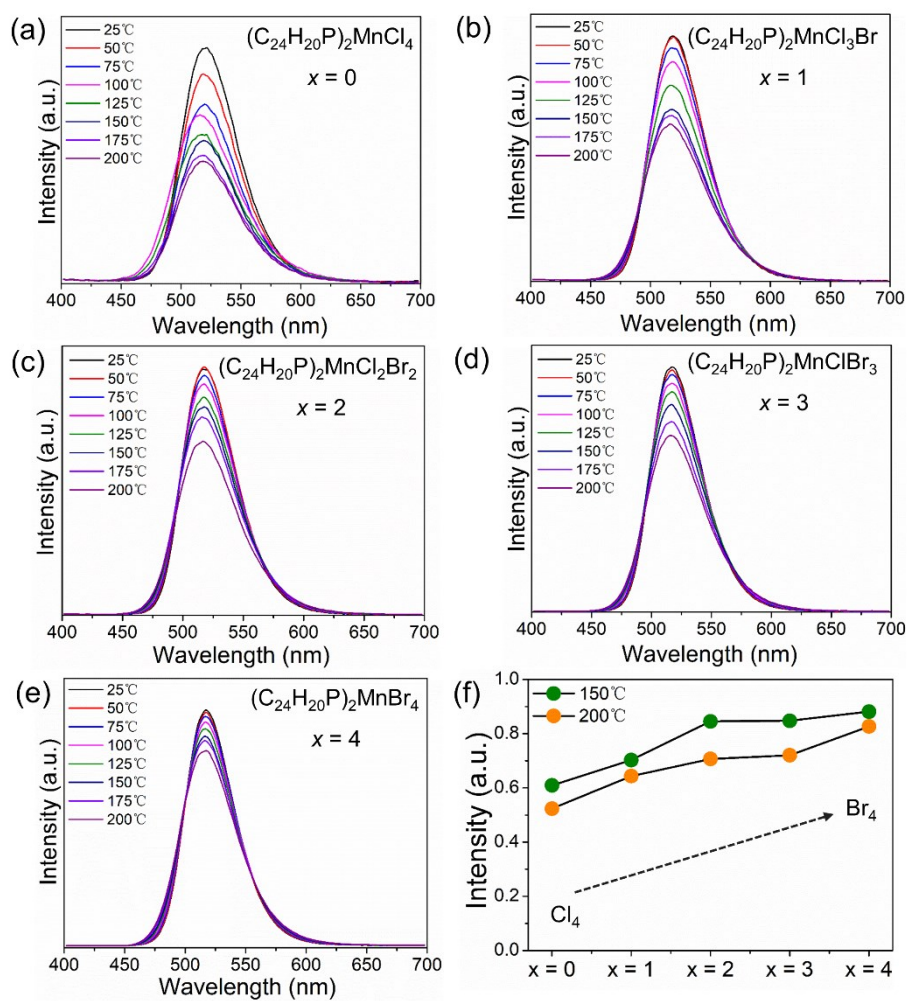

**Figure S6** (a–e) Temperature-dependent PL spectra of  $(C_{24}H_{20}P)_2MnCl_{4-x}Br_x$  ( $x = 0, 1, 2, 3, 4$ ) under 365 nm excitation in the temperature range of RT–200 °C with an interval of 25 °C. (f) The thermal quenching trends of  $(C_{24}H_{20}P)_2MnCl_{4-x}Br_x$  ( $x = 0, 1, 2, 3, 4$ ) at 150 °C and 200 °C, respectively.

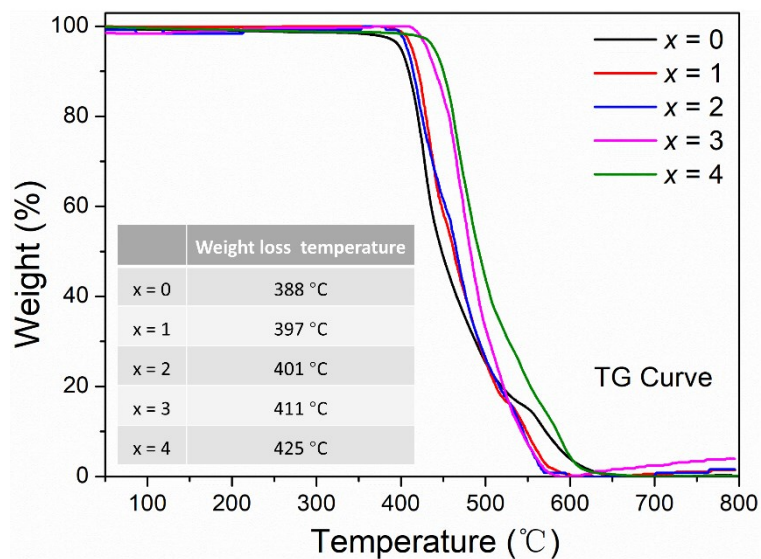

**Figure. S7** Thermogravimetric (TG) curves of  $(C_{24}H_{20}P)_2MnCl_{4-x}Br_x$  ( $x = 0, 1, 2, 3, 4$ ).

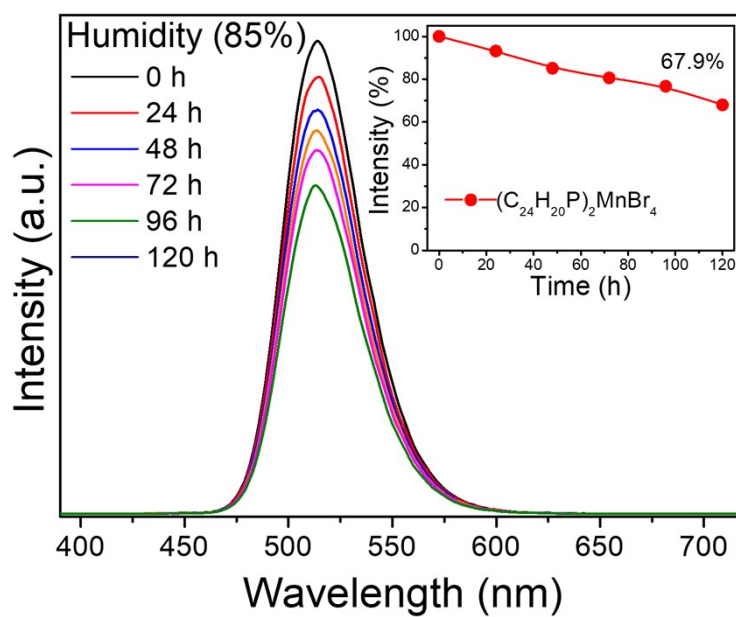

**Figure. S8** Time-dependent PL spectra of  $(C_{24}H_{20}P)_2MnBr_4$  at 85% humidity environment under 365 nm excitation in the time range of 0–120 h with a time interval of 24 h, and the inset is a changing trend of emission intensity.

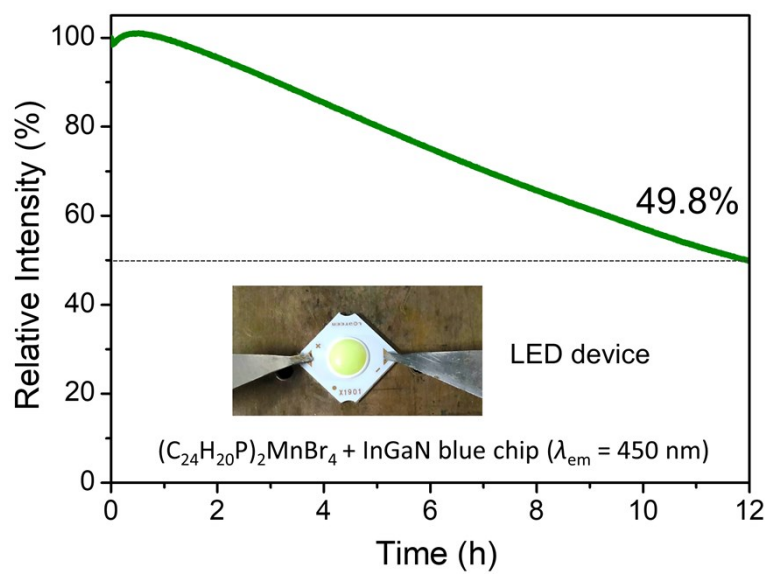

**Figure. S9** Time-dependent emission intensity of the fabricated LED based on  $(C_{24}H_{20}P)_2MnBr_4$  and blue chip, under 20 mA drive current for 12 h.
